# Supplementary material for: The Concordance between Patients’ Renal Replacement Therapy Choice and Definitive Modality: Is It a Utopia?
Source: PubMed Central journal article supplement (PMC4605797; doi:10.1371/journal.pone.0138811), 2015-10-14
Supplement: pone.0138811.s001.pdf [file pone.0138811.s001.pdf]

## Components of the Decision Aid Tools and Activities

| Materials and Activities                                             | Source of the Materials                                                                                                                                                 | Content                                                                                                                                                                                                                                                                                         | Type of Material                 | Location                                                        | Values Phase                                                                      | Informative Phase                                          | Deliberation Phase                                                   | Decision-Making Phase |
|----------------------------------------------------------------------|-------------------------------------------------------------------------------------------------------------------------------------------------------------------------|-------------------------------------------------------------------------------------------------------------------------------------------------------------------------------------------------------------------------------------------------------------------------------------------------|----------------------------------|-----------------------------------------------------------------|-----------------------------------------------------------------------------------|------------------------------------------------------------|----------------------------------------------------------------------|-----------------------|
| <b>Flipchart</b> (paper format or PowerPoint presentation)           | Adapted from an educational material developed by Baxter Healthcare                                                                                                     | Contains information for the patient, a facilitation guide for the professional and elements of deliberation                                                                                                                                                                                    | Informative / Deliberation       | In hospital with professionals and, preferably, a family member | Yes (only the general information about Kidney Disease, symptoms, emotions, etc.) | Yes (only the part corresponding to RRT modalities and CT) |                                                                      |                       |
| <b>Values cards</b> (paper or laminated format)                      | Initially based on an educational material developed by Baxter Healthcare but they were extensively modified as per the participants experience with their own patients | Cards that show affirmations that the educator puts on the table. The patients then interpret how important or unimportant they are based on their own personal values, selecting those which they consider most important.                                                                     | Determining Values and Lifestyle | In hospital with professionals and, preferably, a family member | Yes                                                                               |                                                            | Only if the educator suspects changes in the values for some reason. |                       |
| <b>Decision-making software</b> (questionnaire in electronic format) | Locally produced based on the participants experience with their own patients                                                                                           | Questionnaire of 18 affirmations related to values, lifestyle and worries to which the patient assigns points (from 1 to 5) according to how strongly they agree with each affirmation and which calculates if their preference is for treatments at home or in the hospital based on a matrix. | Determining Values and Lifestyle | In hospital with professionals and, preferably, a family member | Yes                                                                               |                                                            | Only if significant lifestyle changes have occurred                  |                       |

| <b>Materials and Activities</b>                                                     | <b>Source of the Materials</b>                                                                               | <b>Content</b>                                                                                                                                                                              | <b>Type of Material</b>          | <b>Location</b>                                                 | <b>Values Phase</b> | <b>Informative Phase</b> | <b>Deliberation Phase</b>                           | <b>Decision-Making Phase</b> |
|-------------------------------------------------------------------------------------|--------------------------------------------------------------------------------------------------------------|---------------------------------------------------------------------------------------------------------------------------------------------------------------------------------------------|----------------------------------|-----------------------------------------------------------------|---------------------|--------------------------|-----------------------------------------------------|------------------------------|
| <b>Schedule of a work day and a normal weekend</b><br>(electronic format)           | Locally produced based on the participants experience with their own patients                                | Time slots in which patients distribute the activities that they normally conduct. Helps patients anticipate how the treatment options could be adapted to their daily life.                | Determining Values and Lifestyle | In hospital with professionals and, preferably, a family member | Yes                 |                          | Only if significant lifestyle changes have occurred |                              |
| <b>Abbreviated brochure about dialysis modalities</b><br>(paper format)             | Locally produced based on the participants experience with their own patients                                | Basic information about dialysis modalities that is used for pre-reading at home to facilitate understanding of the information that the health professionals will provide in the hospital. | Informative                      | At home with relatives and/or friends                           |                     | Yes                      |                                                     |                              |
| <b>Informational brochure for relatives and/or friends</b> (paper format)           | Locally produced based on the participants experience with their own patients                                | Describes the decision process and how they can help the patients during this process.                                                                                                      | Informative                      | At home with relatives and/or friends                           |                     | Yes                      |                                                     |                              |
| <b>DVD</b>                                                                          | Locally produced with the participation of real Spanish patients and the Spanish Patient Association (ALCER) | Information about the treatments and images of real patients in different RRT options.                                                                                                      | Informative / Deliberation       | At home with relatives and/or friends, or in hospital           |                     | Yes                      | Yes                                                 |                              |
| <b>Expanded brochure about kidney disease, RRT modalities and CT</b> (paper format) | Adapted from an educational material developed by Baxter Healthcare                                          | Contains all the information that the professional has provided the patient in the hospital during the informational phase.                                                                 | Informative                      | At home with relatives and/or friends                           |                     | Yes                      |                                                     |                              |

| <b>Materials and Activities</b>                                                                                    | <b>Source of the Materials</b>                                                      | <b>Content</b>                                                                                                                                                                         | <b>Type of Material</b> | <b>Location</b>                                                 | <b>Values Phase</b> | <b>Informative Phase</b> | <b>Deliberation Phase</b> | <b>Decision-Making Phase</b> |
|--------------------------------------------------------------------------------------------------------------------|-------------------------------------------------------------------------------------|----------------------------------------------------------------------------------------------------------------------------------------------------------------------------------------|-------------------------|-----------------------------------------------------------------|---------------------|--------------------------|---------------------------|------------------------------|
| <b>Brochure about treatment planning for patients who are candidates for kidney transplantation</b> (paper format) | Locally produced based on the participants experience with their own patients       | Contains specific information for patients who are potential candidates for transplantation from living and/or cadaver donors on the importance of planning their long-term treatment. | Informative             | In hospital with professionals and, preferably, a family member |                     | Yes                      |                           |                              |
| <b>Brochure about social assistance benefits (paper format)</b>                                                    | Locally produced based on the experience of the Spanish Patient Association (ALCER) | Social assistance benefits to those patients in Spain who are eligible, in order to reduce the anxiety that these issues cause, which can alter the educational process.               | Informative             | At home with relatives and/or friends                           |                     | Yes                      |                           |                              |
| <b>Advantages and points to consider about dialysis modalities form</b> (paper format)                             | Adapted from an educational material developed by Baxter Healthcare                 | Patients record the advantages and disadvantages they perceive in each modality. The patients should then select those to which they give more weight.                                 | Deliberation            | In hospital with professionals and, preferably, a family member |                     |                          | Yes                       |                              |
| <b>Other Activities</b>                                                                                            | As per hospital protocol and regulation                                             | Additional activities that the hospital implements according to its organization (visits to the PD and HD units, interviews with other patients, patient groups, etc.).                | Deliberation            | In hospital with professionals and, preferably, a family member |                     |                          | Yes                       |                              |

| <b>Materials and Activities</b>                                | <b>Source of the Materials</b>                                                | <b>Content</b>                                                                                                                                                                                                                                                                                                                                 | <b>Type of Material</b> | <b>Location</b>                                                 | <b>Values Phase</b> | <b>Informative Phase</b> | <b>Deliberation Phase</b> | <b>Decision-Making Phase</b>                                                                                                                                  |
|----------------------------------------------------------------|-------------------------------------------------------------------------------|------------------------------------------------------------------------------------------------------------------------------------------------------------------------------------------------------------------------------------------------------------------------------------------------------------------------------------------------|-------------------------|-----------------------------------------------------------------|---------------------|--------------------------|---------------------------|---------------------------------------------------------------------------------------------------------------------------------------------------------------|
| <b>Situation form regarding decision making</b> (paper format) | Locally produced based on the participants experience with their own patients | Questionnaire that allows patients to evaluate in which phase in the decision process they are (if they are still evaluating the options, if they have an initial choice, or if the choice is definitive). The questionnaire is used from the beginning of the informational phase and thereafter, every time the patient visits the hospital. | Deliberation            | In hospital with professionals and, preferably, a family member |                     | Yes                      | Yes                       | Yes. Patients are considered to have made a decision when they report that they have made a definitive decision and are not going to change it.               |
| <b>Informed Consent</b>                                        | As per hospital protocol and regulation                                       |                                                                                                                                                                                                                                                                                                                                                | Official Documents      |                                                                 |                     |                          |                           | Official consent forms from each hospital or autonomous region are used for the choice, start of treatment, and performance of vascular or peritoneal access. |
